# Supplementary material for: Biomechanical rupture risk assessment of abdominal aortic aneurysms using clinical data: A patient-specific, probabilistic framework and comparative case-control study
Source: PLoS One. 2020 Nov 19;15(11):e0242097. doi: 10.1371/journal.pone.0242097 (PMC7676745; doi:10.1371/journal.pone.0242097)
Supplement: S4 Table — Computed true positive rates (TPR), false positive rates (FPR) and corresponding threshold values for ℙrupt. (CSV) [file pone.0242097.s004.csv]

fpr [-]	tpr [-]	thresholds [%]
0.0	0.0	25.87
0.0	0.05555555555555555	24.87
0.0	0.2222222222222222	9.77
0.05555555555555555	0.2222222222222222	8.77
0.05555555555555555	0.3888888888888889	5.9799999999999995
0.1111111111111111	0.3888888888888889	5.52
0.1111111111111111	0.5555555555555556	4.35
0.16666666666666666	0.5555555555555556	4.3
0.16666666666666666	0.7222222222222222	2.3800000000000003
0.2222222222222222	0.7222222222222222	2.32
0.2222222222222222	0.7777777777777778	2.09
0.4444444444444444	0.7777777777777778	1.46
0.4444444444444444	0.8333333333333334	1.44
0.5	0.8333333333333334	1.34
0.6111111111111112	0.8333333333333334	1.22
0.7777777777777778	0.8333333333333334	1.04
0.7777777777777778	0.8888888888888888	0.89
0.8888888888888888	0.8888888888888888	0.76
0.9444444444444444	0.8888888888888888	0.31
0.9444444444444444	0.9444444444444444	0.18
1.0	0.9444444444444444	0.13
1.0	1.0	0.02
